# Supplementary material for: HN1L Promotes Triple-Negative Breast Cancer Stem Cells through LEPR-STAT3 Pathway
Source: PubMed Central journal article supplement — Stem Cell Reports. 2017 Dec 14;10(1):212–27. doi: 10.1016/j.stemcr.2017.11.010 (PMC5768915; doi:10.1016/j.stemcr.2017.11.010), 2017-12-14

Stem Cell Reports, Volume 10

## Supplemental Information

### ***HN1L Promotes Triple-Negative Breast Cancer Stem Cells through LEPR-STAT3 Pathway***

**Yi Liu, Dong Soon Choi, Jianting Sheng, Joe E. Ensor, Diana Hwang Liang, Cristian Rodriguez-Aguayo, Amanda Polley, Steve Benz, Olivier Elemento, Akanksha Verma, Yang Cong, Helen Wong, Wei Qian, Zheng Li, Sergio Granados-Principal, Gabriel Lopez-Berestein, Melissa D. Landis, Roberto R. Rosato, Bhuvanesh Dave, Stephen Wong, Dario Marchetti, Anil K. Sood, and Jenny C. Chang**

## Supplementary Materials

**Table S1: List of 13 CSC genes**

| <b>Gene Symbols</b> | <b>Gene name</b>                                                     |
|---------------------|----------------------------------------------------------------------|
| <i>RPL39</i>        | ribosomal protein L39                                                |
| <i>MLF2</i>         | myeloid leukemia factor 2                                            |
| <i>HN1L</i>         | hematological and neurological expressed 1-like                      |
| <i>MAGI3</i>        | membrane associated guanylate kinase, WW and PDZ domain containing 3 |
| <i>GNAZ</i>         | G protein subunit alpha z                                            |
| <i>HMGXB3</i>       | HMG-box containing 3                                                 |
| <i>ZBTB16</i>       | zinc finger and BTB domain containing 16                             |
| <i>KIF16B</i>       | kinesin family member 16B                                            |
| <i>TRBV19</i>       | T cell receptor beta variable 19                                     |
| <i>MARVELD2</i>     | MARVEL domain containing 2                                           |
| <i>MAP7</i>         | microtubule associated protein 7                                     |
| <i>SHB</i>          | Src homology 2 domain containing adaptor protein B                   |
| <i>PLCH1</i>        | phospholipase C eta 1                                                |

**Table S2: List of mutations identified using RNA-seq in patients with lung metastasis.**

| Gene        | AA. variant | Chr. | Base Position | refBase | altBase |
|-------------|-------------|------|---------------|---------|---------|
| <i>HN1L</i> | p.P20L      | 16   | 1735454       | C       | T       |
| <i>HN1L</i> | p.A106V     | 16   | 1741967       | C       | T       |

**Table S3: siRNA sequences targeting the 11 BCSC genes.**

| Name             | Sequence (Sense)        | Sequence (Antisense)   |
|------------------|-------------------------|------------------------|
| <i>HN1L</i>      | CGCCUGUAUUUGGAAGAUUUAA  | UUAAAUCUCCAAAACAGGCA   |
| <i>MAG13</i>     | CCCUUCUGAGGUCUACCUGAAA  | UUUCAGGUAGACCUCAGAAGGA |
| <i>SHB</i>       | ACCUUCUUUGCUGGCUUUUAUUA | UAAUAAAGCCAGCAAAGAAGGG |
| <i>KIF16B</i>    | CGGCUGAGAAGUUUCAGAUUUU  | AAUAUCUGAAACUUCUCAGCCU |
| <i>GNAZ</i>      | CGCUAAGUGUCUUGGUUUUUAA  | UUAAAUACCAAGACACUUAGCU |
| <i>PLCH1</i>     | CGCUCAGUACCUGAAAGGAAUA  | UAUCCUUUCAGGUACUGAGCA  |
| <i>ZBTB16</i>    | ACCCUUCAGUCUCCACUUCAUU  | AAUGAAGUGGAGACUGAAGGGC |
| <i>MAP7</i>      | AUCUUACAUAUAUGUAUUUAUUA | UUUAAAUAACAUUAUGUAAGAG |
| <i>MARVELD2</i>  | AUGCUACUAUCCGUUAUUUAAU  | AUUAAAUAACGGAUAGUAGCAG |
| <i>TRBV19</i>    | AACCUGAGUUGUGAACAGAAU   | AUUCUGUUCACAACUCAGGGUC |
| <i>HMGXB3</i>    | GCCUGUCUAUGUGGUAGAU     | AUCUACCACAUAGACAGGC    |
| <i>Scrambled</i> | AUCUCGCUUGGGCGAGAGUAAG  | CUUACUCUCGCCCAAGCGAGAG |

## Supplementary Experimental Procedures

### Screening BCSC candidate genes.

MDA-MB-231 cells were screened for mammosphere forming ability against 11 genes from the 13 genes (Table S1) using each specific siRNA (Table S3). Cells (200,000 cells/well) in an ultralow-attachment 24-well plate were transfected in 6 replicates using siPORT (Invitrogen) according to the manufacturer's instruction. The final concentration of each siRNA was 30nM per well. Methyl cellulose (1%) was used to for the mammosphere formation assay. For the secondary mammosphere formation, 5000 cells were used for each well in 6 replicates per gene. We repeated the screening twice with similar gene silencing effects on the mammosphere formation of MDA-MB-231

### siRNA and shRNA knockdown.

*HNIL* shRNA sequences are: 5'-CGCCTGTATTTGGAAGATTTAA-3' and 3'-TTAAATCTTCCAAATACAGGCA-5'. siRNA was tranfected *in vitro* using Lipofectamine 2000 (Invitrogen) or TransIt-TKO (Mirus Bio, Madison, WI). The optimal *HNIL* siRNA sequences delivered were obtained from Ambion; *HNIL* siRNA1 :5'-CCAAGGAUCAUGUUUUCUU-3' and 3'-AAGAAAACAUGAUCCUUGG-5', *HNIL* siRNA2: 5'-CCUCAGAACAUAACCAAGA-3' and 3'-UCUUGGGUAUGUUCUGAGG-5'. Scrambled siRNA sequences are 5'-CGUGAACACGCAACUAAGG-3' and 3'-CCUUAGUUGCGUGUUCACG-5'. *LEPR* siRNA were also purchased from Ambion, and sequences are 5'-GAGUGAUGAUGUUAGCAAA-3' and 3'-UUUGCUAACAUGAUCACUC-5'. For *in vivo* delivery, we used *HNIL* siRNA1. For testing gene silencing effects on MSFE, cells were treated with siRNAs (25 to 50nM) for 48 hours in advance. When plated into the assay

plates, cells were treated again with 25nM of siRNAs. For the secondary mammosphere assay, no siRNA transfection was used.

### **Fluorescence-activated cell sorting (FACS) analysis.**

The gating was performed as previously described (Li, Lewis et al. 2008, Creighton, Li et al. 2009, Choi, Blanco et al. 2014, Dave, Granados-Principal et al. 2014). Briefly, side scatter and forward scatter were used to eliminate debris and doublets, and Sytox-Blue staining was used to differentiate live and dead cells. The remaining tumor cells were further analyzed using antibodies, CD44-APC and CD24-FITC or -PE-Cy7 or by measuring aldehyde dehydrogenase activity. For In Vivo tumors, tumor cells negative for H2kD were analyzed for CSCs. Data analysis was performed with FACS Diva (BD Biosciences, San Jose, C.A., USA). CD44<sup>+</sup>/CD24<sup>-/low</sup> (BCSC) and other cells (non-BCSC) were sorted as previously described (Creighton, Li et al. 2009). Both flow analysis and sorting were performed at the Houston Methodist Research Institute Flow Cytometry Core, using BD FACS Fortessa for analysis and BD FACS Aria II for cell sorting. All in vitro experiments were repeated three times with 3 replicates. The average values of a single experiment were shown in the figure.

### **Mammosphere Assay**

Cells treated with either siRNA or plasmid for different durations were trypsinized, collected and counted for mammosphere assay. Mammospheres were growing in MammoCult medium with 0.5% methylcellulose. Cells were seeded at 1,000 to 5,000 cells per well in 500µl Mammocult medium in 24-well ultra-low attachment plate (Corning, Lowell, MA). Every three days, 100 µl of fresh Mammocult medium was added into the well. After 5-14 days, depending on the cells,

mammospheres formed and were counted with GelCount (Oxford Optronix, Oxford, UK) and its bundled software. For the secondary mammosphere assay, cells were collected with 0.05% trypsin for 5 minutes followed by neutralization with 10% FBS. The cells were then re-suspended in MammoCult medium and seeded at 1,000 cells per well. Secondary mammosphere formed in SUM159 cells were counted on day 10 and in MDA-MB-231 cells were counted on day 14. Mammosphere assays were repeated with 6-12 replicates for each treatment group.

### **Western blot**

Cells treated with siRNA or plasmids with different durations were lysed in a lysis buffer (1.5% Triton X-100 and 10% glycerol in DPBS) containing a proteinase and phosphatase inhibitor cocktail (Thermo Scientific Pierce Protein Biology, Rockford, IL). 30-500 µg of protein extracts were loaded for western blot.

### **Cell migration and invasion assays.**

50,000 cells were seeded in each well after overnight starvation in serum-free medium, and migration was measured 6 hours after adding DMEM+10%FBS as a chemoattractant. For the invasion assay, the Boyden Chamber was coated with 0.1x BME solution and invasion was measured after 24 hours. In the 3D invasion assay, 5,000 cells were plated in each well and cells invaded for 4 days in invasion matrix. Data was quantified using the Image J Program.

## ***In vivo Experiments.***

**MDA-MB-231 cell line tumor model:**  $3 \times 10^6$  MDA-MB-231 cells injected into the mammary fat pad of SCID-Beige mice were grown to 150-300 mm<sup>3</sup>. Then, mice were randomized into 5 groups: (i)scrambled siRNA-DOPC, (ii)*HNIL* siRNA-DOPC, (iii)docetaxel+PBS, (iv)docetaxel +scrambled siRNA-DOPC, (v)docetaxel+*HNIL* siRNA-DOPC. Groups (i), (ii), (iv), and (v) (n=10) were treated with 5 µg/mouse DOPC nanoliposomal siRNA intraperitoneal (IP) injection twice a week for 3 weeks. Mice were sacrificed on day 21. Tumors were harvested and analyzed for BCSCs using FACS, MSFE and limiting dilution assays as previously described (Schott, Landis et al. 2013). Limiting dilution assays were analyzed by Extreme Limiting Dilution Analysis (ELDA) (Hu and Smyth 2009). Groups (iii) - (v) (n=13) were given 20 mg/kg docetaxel IP injection every 2 weeks for a total of 6 weeks. Respective 5 µg/mouse DOPC-liposomal siRNA was also given twice a week for a total of 6 weeks. Treatment ended on day 42, but mice were continuously monitored without any treatment until day 58.

In order to investigate *HNIL* siRNA treatment effects on lung metastasis,  $3 \times 10^6$  MDA-MB-231 cells transfected with luciferase were injected into the mammary fat pad of each SCID-Beige mouse, and the mice were randomized into 4 groups (n=10) when the primary tumor reached 150-300mm<sup>3</sup>: (i)scrambled siRNA-DOPC, (ii)*HNIL* siRNA-DOPC, (iii)docetaxel+scrambled siRNA-DOPC, (iv)docetaxel+*HNIL* siRNA-DOPC. Treatment schedule was the same as above. At the end of the study, mice were sacrificed and lungs were harvested and imaged as previously described (Choi, Blanco et al. 2014).

**SUM159 cell line tumor model:**  $1 \times 10^6$  SUM159 cells injected into the mammary fat pad of SCID-Beige mice were grown to  $\sim 200 \text{ mm}^3$ . Then, mice were randomized into 2 groups: (i) scrambled siRNA-DOPC, (ii) *HNIL* siRNA-DOPC. Groups (i) and (ii), (n=9), were treated with 5  $\mu\text{g}/\text{mouse}$  DOPC nanoliposomal siRNA intraperitoneal (IP) injection twice a week for 3 weeks. Mice were sacrificed on day 21. Tumors were harvested and analyzed for BCSCs using FACS, and MSFE analysis in vitro (Schott, Landis et al. 2013).

**BCM2665 tumor model:** In docetaxel-resistant BCM2665 PDX xenografts, tumors were transplanted into the mammary fat pad of SCID-Beige mice. Mice were randomized into 5 groups when tumor volume reached  $150\text{-}200 \text{ mm}^3$ : (i) scrambled siRNA-DOPC, (ii) *HNIL* siRNA-DOPC, (iii) docetaxel+PBS, (iv) docetaxel+scrambled siRNA-DOPC, (v) docetaxel+*HNIL* siRNA-DOPC. Groups (i) and (ii) (n=10) were treated with 5  $\mu\text{g}/\text{mouse}$  DOPC nanoliposomal siRNA IP injection twice a week for 3 weeks. Mice were sacrificed on day 21. Tumors were harvested and analyzed for BCSC using FACS and MSFE. Groups (iii) - (v) (n=15) were given 33.3 mg/kg docetaxel IP injection on day 1, 8 and 22. DOPC-liposomal siRNA (5  $\mu\text{g}/\text{mouse}$ ) was given twice a week for 5 weeks. At the end of the study, mice were sacrificed and tumors were harvested for limiting dilution assays as previously described (Chen, Iliopoulos et al. 2014). Tumor pieces containing  $6 \times 10^5$ ,  $3 \times 10^5$  or  $1 \times 10^5$  cells were transplanted with basal membrane extract into mammary glands on both sides of nude mice. Tumor incidence was reported at 4 weeks after transplantation on the counts of established tumors (equal or larger than  $50 \text{ mm}^3$ ). Limiting dilution assays were analyzed by Extreme Limiting Dilution Analysis (ELDA) (Hu and Smyth 2009). DOPC nanoliposomal siRNA was prepared as previously described (Landen, Chavez-Reyes et al. 2005, Tanaka, Mangala et al. 2010).



## **ChIP and ChIP-seq.**

ChIP DNA was prepared into libraries and sequenced by the Epigenomics Core of Weill Cornell Medical College using SR50 lane. Antibodies used are anti-FLAG (Sigma, #3165) and anti-mouse IgG (EMD Millipore, #12-371). ChIP-Seq analysis began with mapping the sequenced reads to the genome. We utilized the Burrows-Wheeler Aligner (BWA) MEM algorithm to align the sequence reads against the human genome GRCh37/hg19 Assembly (Li 2013). We next used the Hypergeometric Optimization of Motif Enrichment (HOMER) suite of tools to find and annotate peaks, and identify enriched motifs. First, we utilized HOMER's findPeaks tool to perform peak calling. Peak calling identifies the regions in the genome where a significant number of sequencing reads are found. These peaks were visualized in bigWig track file format in the UCSC genome browser. This UCSC-accepted file was created by first running HOMER's makeUCSCfile tool followed by UCSC's bedGraphToBigWig script. Next, HOMER's annotatePeaks.pl program was used to associate peaks with nearby genes. From here we compared the list of nearby genes with the HN1L and BCSC gene signatures, as well as CSC TF's. The final stage of the ChIP-Seq analysis involved using HOMER's findMotifsGenome.pl program to find enriched motifs, and ultimately, consensus sequences in the ChIP-Seq peaks. The results include a ranked list of de novo and known motifs. The "best" motifs are those with p-values significantly smaller than 1e-50. The p-value in this application is a measure of the ratio of target peaks containing the motif to background peaks containing the motif (Heinz, Benner et al. 2010). Using the chosen motif file from HOMER, we used the R program "seqLogo" to create a visually informative motif logo (Bindewald, Schneider et al. 2006). To confirm the peaks found by HOMER's findPeaks tool, and

to check for additional peaks, we used another peak-finding algorithm, the Model-based Analysis for ChIP-Seq (MACS) program, to find peaks in our sample. Following this, we used the online tool PAVIS to annotate these peaks (Zhang, Liu et al. 2008, Huang, Loganantharaj et al. 2013). The GEO accession number for this ChIP-seq data is GSE105446

### **Gene expression microarray analysis.**

Microarrays were performed, using Affymetrix genechip U133plus 2.0. Normalization and evaluation of the data was performed as previously described (Dave, Granados-Principal et al. 2014). Differentially expressed genes were identified as the *HNIL* knockdown gene signature with cutoff  $p$  value less than 0.05 and fold-change greater than 1.5. Further functional and pathway analyses were done by Ingenuity Pathway Analysis (IPA) tools. Gene Set Enrichment Analysis (GSEA) was used to determine the alternation of the *JAK-STAT* pathway in *HNIL* siRNA-treated tumors compared with scrambled siRNA-treated tumors.

### **MicroRNA array analysis.**

miRNA expression values obtained from affymetrix – miRNA array 4.0 was used to perform differential expression analysis across the 10 tumor samples. Bioinformatic analysis was performed to study changes in miRNA profiles between scrambled siRNA-treated mice and *HNIL* siRNA-treated mice tumor samples. Expression values were processed and normalized using the *affy* library in R statistical software. Only human probes were isolated, from the multispecies miRNA profiling by the miRNA array 4.0, for the purpose of the analysis. Given the 6631 human probes, supervised expression based clustering was performed to remove outlier samples present in the sample groups. Differential expression analysis was then performed using *limma* package

in R. The most significantly differentially expressed miRNAs were selected based on a cut off log fold change > 1 and FDR < 0.2. The GEO SuperSeries accession number for this microRNA array data is GSE106200.

### **Real-time PCR analysis.**

All primers used are listed below and were designed using Primer3 and synthesized by Sigma.

*STAT3* forward 5'-CCAAGATAGCGCCACTGC-3'; reverse 5'-

ACATGTATCCTGTTAATTGACTTGC-3'. *FGFR2* forward 5'-

TGCACTATTCACCCAACCTTCT-3'; reverse 5'-AGGAATGTGTTTGTGGCCAC-3'. All

TaqMan Gene Expression Assays were purchased from Invitrogen; *STAT3* (Assay ID:

Hs01051722\_s1), *LEPR* (Assay ID: Hs00174492\_m1), *LEP* (Assay ID: Hs00174877\_m1), and

*HN1L* (Assay ID: Hs00375909\_m1). Eukaryotic 18S rRNA Endogenous Control (Invitrogen)

was used as an internal control. Gene expression was analyzed using a standard curve for each

gene as described previously (Choi, Blanco et al. 2014, Dave, Granados-Principal et al. 2014),

PCR were repeated two to three times with three technical repeats. Representative results are

shown in the Fig. with standard deviation.

### **Rescue experiment by constitutively active *STAT3*.**

EF.STAT3DN.Ubc.GFP (Addgene plasmid # 24984) and EF.STAT3C.Ubc.GFP (Addgene

plasmid # 24983) were gifts from Linzhao Cheng. SUM159 cells ( $2 \times 10^6$  cells) were co-transfected

with these plasmids and siRNAs (50nM) using Lipofectamine 2000 (Invitrogen) according to the

manufacturer's manual. After 48 hours later, cancer cells were analyzed for CD44<sup>+</sup>/CD24<sup>low/-</sup>

breast cancer stem cells by FACS or for MSFE as described earlier. For FACS analysis, the same

gating strategy was used as described in the Fluorescence-activated cell sorting (FACS) analysis section with an additional EGFP positive gate. The FACS data were the average values of three biological repeats. The mammosphere experiments were repeated twice with 6 replicates. The average values of one experiment were presented in the figure.

### **MicroRNA array analysis.**

MicroRNA arrays were performed on 10 snap-frozen tumor samples from scrambled siRNA-treated and *HN1L*-siRNA treated BCM2665 xenografts (5 samples from each treatment group), as described in the Supplemental Experimental Procedures.

## Supplementary Figure Legends

**Fig. S1. *HN1L* is one of the top candidate genes critical for breast cancer mammosphere forming ability.** MDA-MB-231 cells were transfected with each specific siRNAs (30nM) prior to the primary mammosphere assay. Scrambled siRNA was used as the control. After the primary mammosphere formation, the cancer cells (5000 cells/well) were re-seeded for the secondary mammosphere. Each MS sample included 6 replicants, and experiments were repeated 3 times independently.

**Fig. S2. Non-TNBC patients show no survival correlation with the expression levels of *HN1L*.** (A and C) The expression *HN1L* is not correlated with the overall survival of patients with non-TNBC. TNBC patients with the higher expression level of *HN1L* tend to show the shorter overall survival than those with lower *HN1L* expression (B). (A) TCGA; (B) and (C): Curtis.

**Fig. S3. *HN1L* silencing has anti-CSC effects.**

(A) Western blot showing *HN1L* knockdown by two different *HN1L* siRNAs in TNBC cell lines, SUM159, MDA-MB-231, and MDA-MB-468. (B) *HN1L* siRNA silencing decreased CD44<sup>+</sup>/CD24<sup>-low</sup> population by flow cytometry analysis in SUM159, MDA-MB-231, and MDA-MB-468 cell lines. (C) *HN1L* siRNA silencing reduced primary and secondary MSFE in SUM159 and MDA-MB-231 cell lines. Each experimental group had 6 replicates, and all experiments were repeated three times. (D) Immunohistochemistry staining of tumor samples using *HN1L* antibody to show target engagement. (E) A statistically non-significant decrease in ALDF<sup>+</sup> cells was apparent in MDA-MB-231 cells with *HN1L* knockdown. (F-H) SUM159 cells were injected into SCID Beige mice and allowed tumors to grow to ~200mm<sup>3</sup> before were randomized into different groups. These mice were injected with the respective DOPC liposomal

siRNA by i.p. injection at 5µg/injection twice a week for 3 weeks. Two treatment groups (n=10): scrambled siRNA, *HN1L* siRNA. (F) Tumor volume was measured. Mice were sacrificed 3 weeks later, and tumors were collected and processed for flow analysis of CD44+/CD24-/low cells (G), and ALDF+ cells (H). (\*p<0.05, \*\*p<0.01, \*\*\*p<0.001). All experiments were repeated three times with three technical repeats. For the purpose of publication, representative data of a repeat is presented. For the multiple comparison, Tukey's multiple comparison tests for one-way ANOVA was performed with Graphpad Prism 5.0 (Graphpad Software Inc., La Jolla, CA, USA).

**Fig. S4. *HN1L* silencing effect *in vivo*.** (A) Western blot data assessing *HN1L*, *LEPR* and *STAT3* signaling in BCM2665 xenograft tumors under different treatment conditions; siScr: scrambled siRNA.  $\beta$ -actin serves as a loading control. (B) Tumor volume of mice from 3 treatment groups (n=13): docetaxel+PBS, docetaxel+scrambled siRNA, docetaxel+*HN1L* siRNA. Docetaxel was given every 2 weeks for 3 cycles. Liposomal siRNA was delivered twice a week for 6 weeks. Tumor volumes were still monitored for 2 more weeks after treatment was stopped. (C) Effects of *HN1L* knockdown on metastasis *in vivo*. *Ex vivo* imaging on lungs from each group on day 21 were presented on the upper panel when *HN1L* siRNA was used as single agent. *Ex vivo* imaging on lungs from each group on day 58 were shown on the lower panel when *HN1L* siRNA was combined with Docetaxel. (\*p<0.05)

**Fig. S5. *HN1L* regulates expression of *STAT3-LEPR* signaling pathway** (A) Overexpression of *HN1L* cells upregulated phosphorylation of *STAT3* and *LEPR* protein expression in SUM159. (B) Conversely, *HN1L* gene silencing reduced the mRNA expression of *STAT3*. (C) Overexpression of *HN1L* increases the mRNA levels of *STAT3* and *LEPR* in MDA-MB-231 and

SUM159. (D-E) Co-transfection with *HN1L* siRNA and a plasmid with constitutively active *STAT3-GFP* gene rescues the anti-CSC effects of *HN1L* silencing. For the mammosphere formation assay, each experimental group had 6 replicates, and all experiments were repeated three times. All experiments were repeated three times with three technical repeats. For the purpose of publication, representative data of a repeat is presented. For the multiple comparison, Tukey's multiple comparison tests for one-way ANOVA was performed with Graphpad Prism 5.0 (Graphpad Software Inc., La Jolla, CA, USA).

**Fig. S6. ChIP peaks in *LEPR* called by MACS.** (A) Identification of *HN1L* motif in *HN1L* overexpressed SUM159 ChIP-seq data. Anti-FLAG antibody was used for ChIP. Matrices predicted by HOMER Motif Analysis. (B) Visualized peaks shown in both input and anti-FLAG samples. The peak found by MACS and validated by QPCR (C) was indicated by the red arrow. (D) Pathway analysis by STRING 10 revealed top pathways regulated by the overlapped genes from Fig. 7.

**Fig. S7. *HN1L* regulates *LEPR* and *miR150* pathways which converge into *STAT3*.** (A) Top most differentially expressed miRNAs between scrambled siRNA-treated mice tumors and *HN1L* siRNA-treated tumors in BCM2665 xenografts (n=4 for each treatment arm). miRNA were selected based on a cut-off log fold change >1 and FDR <0.2. (B) Table showing the ID, log fold change and p-value of the top 4 most upregulated (positive value in logFC) or downregulated (negative value) miRNA. (C) Validation of reduced miR-150 in *HN1L* siRNA-treated tumors by qPCR. (D) Protein-protein interactions of known miR-150 targets with *LEPR-STAT3* are presented by STRING 10. Thicker lines indicate the stronger confidence of associations.

## References

- Bindewald, E., T. D. Schneider and B. A. Shapiro (2006). "CorreLogo: an online server for 3D sequence logos of RNA and DNA alignments." Nucleic Acids Res **34**(Web Server issue): W405-411.
- Chen, X., D. Iliopoulos, Q. Zhang, Q. Tang, M. B. Greenblatt, M. Hatzia Apostolou, E. Lim, W. L. Tam, M. Ni, Y. Chen, J. Mai, H. Shen, D. Z. Hu, S. Adoro, B. Hu, M. Song, C. Tan, M. D. Landis, M. Ferrari, S. J. Shin, M. Brown, J. C. Chang, X. S. Liu and L. H. Glimcher (2014). "XBP1 promotes triple-negative breast cancer by controlling the HIF1alpha pathway." Nature **508**(7494): 103-107.
- Choi, D. S., E. Blanco, Y. S. Kim, A. A. Rodriguez, H. Zhao, T. H. Huang, C. L. Chen, G. Jin, M. D. Landis, L. A. Burey, W. Qian, S. M. Granados, B. Dave, H. H. Wong, M. Ferrari, S. T. Wong and J. C. Chang (2014). "Chloroquine eliminates cancer stem cells through deregulation of Jak2 and DNMT1." Stem cells **32**(9): 2309-2323.
- Creighton, C. J., X. Li, M. Landis, J. M. Dixon, V. M. Neumeister, A. Sjolund, D. L. Rimm, H. Wong, A. Rodriguez, J. I. Herschkowitz, C. Fan, X. Zhang, X. He, A. Pavlick, M. C. Gutierrez, L. Renshaw, A. A. Larionov, D. Faratian, S. G. Hilsenbeck, C. M. Perou, M. T. Lewis, J. M. Rosen and J. C. Chang (2009). "Residual breast cancers after conventional therapy display mesenchymal as well as tumor-initiating features." Proc Natl Acad Sci U S A **106**(33): 13820-13825.
- Dave, B., S. Granados-Principal, R. Zhu, S. Benz, S. Rabizadeh, P. Soon-Shiong, K. D. Yu, Z. Shao, X. Li, M. Gilcrease, Z. Lai, Y. Chen, T. H. Huang, H. Shen, X. Liu, M. Ferrari, M. Zhan, S. T. Wong, M. Kumaraswami, V. Mittal, X. Chen, S. S. Gross and J. C. Chang (2014). "Targeting RPL39 and MLF2 reduces tumor initiation and metastasis in breast cancer by inhibiting nitric oxide synthase signaling." Proc Natl Acad Sci U S A **111**(24): 8838-8843.
- Heinz, S., C. Benner, N. Spann, E. Bertolino, Y. C. Lin, P. Laslo, J. X. Cheng, C. Murre, H. Singh and C. K. Glass (2010). "Simple combinations of lineage-determining transcription factors prime cis-regulatory elements required for macrophage and B cell identities." Mol Cell **38**(4): 576-589.
- Hu, Y. and G. K. Smyth (2009). "ELDA: extreme limiting dilution analysis for comparing depleted and enriched populations in stem cell and other assays." J Immunol Methods **347**(1-2): 70-78.
- Huang, W., R. Loganantharaj, B. Schroeder, D. Fargo and L. Li (2013). "PAVIS: a tool for Peak Annotation and Visualization." Bioinformatics **29**(23): 3097-3099.
- Landen, C. N., Jr., A. Chavez-Reyes, C. Bucana, R. Schmandt, M. T. Deavers, G. Lopez-Berestein and A. K. Sood (2005). "Therapeutic EphA2 gene targeting in vivo using neutral liposomal small interfering RNA delivery." Cancer Res **65**(15): 6910-6918.
- Li, H. (2013). "Aligning sequence reads, clone sequences and assembly contigs with BWA-MEM." eprint arXiv:1303.3997.
- Li, X., M. T. Lewis, J. Huang, C. Gutierrez, C. K. Osborne, M. F. Wu, S. G. Hilsenbeck, A. Pavlick, X. Zhang, G. C. Chamness, H. Wong, J. Rosen and J. C. Chang (2008). "Intrinsic resistance of tumorigenic breast cancer cells to chemotherapy." J Natl Cancer Inst **100**(9): 672-679.
- Schott, A. F., M. D. Landis, G. Dontu, K. A. Griffith, R. M. Layman, I. Krop, L. A. Paskett, H. Wong, L. E. Dobrolecki, M. T. Lewis, A. M. Froehlich, J. Paraniyam, D. F. Hayes, M. S. Wicha and J. C. Chang (2013). "Preclinical and clinical studies of gamma secretase inhibitors with docetaxel on human breast tumors." Clin Cancer Res **19**(6): 1512-1524.



Tanaka, T., L. S. Mangala, P. E. Vivas-Mejia, R. Nieves-Alicea, A. P. Mann, E. Mora, H. D. Han, M. M. Shahzad, X. Liu, R. Bhavane, J. Gu, J. R. Fakhoury, C. Chiappini, C. Lu, K. Matsuo, B. Godin, R. L. Stone, A. M. Nick, G. Lopez-Berestein, A. K. Sood and M. Ferrari (2010). "Sustained small interfering RNA delivery by mesoporous silicon particles." Cancer Res **70**(9): 3687-3696.

Zhang, Y., T. Liu, C. A. Meyer, J. Eeckhoute, D. S. Johnson, B. E. Bernstein, C. Nusbaum, R. M. Myers, M. Brown, W. Li and X. S. Liu (2008). "Model-based analysis of ChIP-Seq (MACS)." Genome Biol **9**(9): R137.

**Fig. S1**

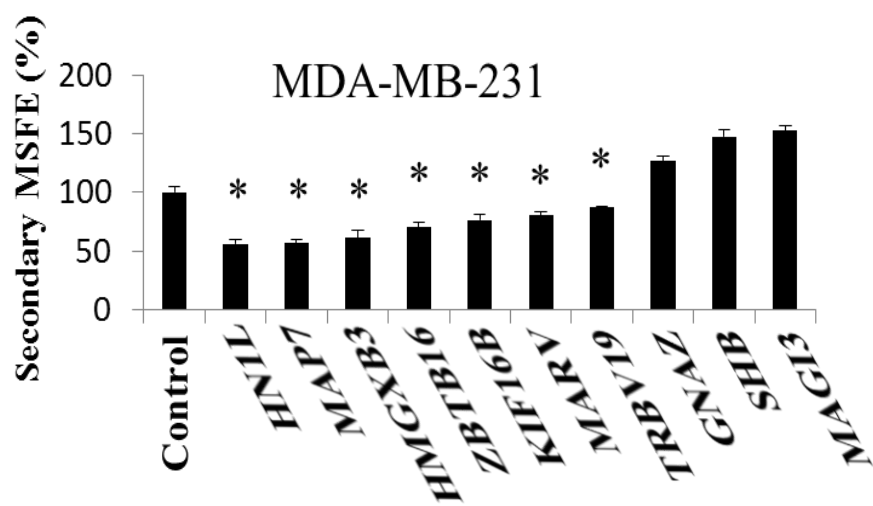

Fig. S2

A

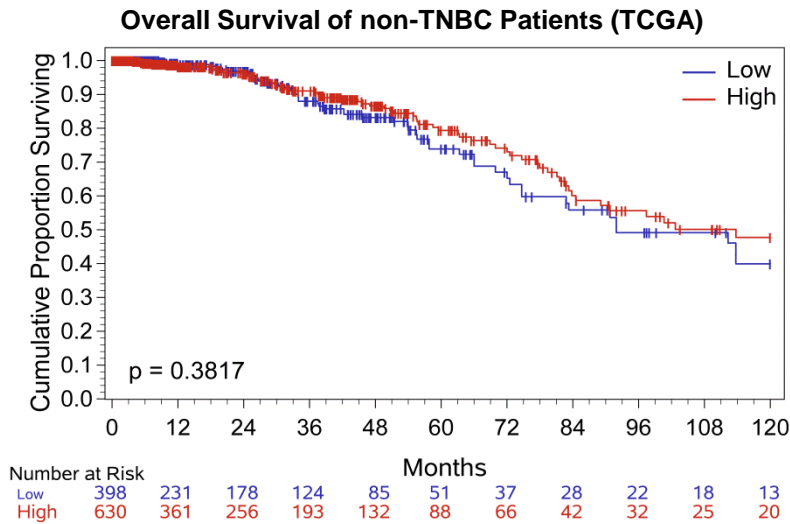

B

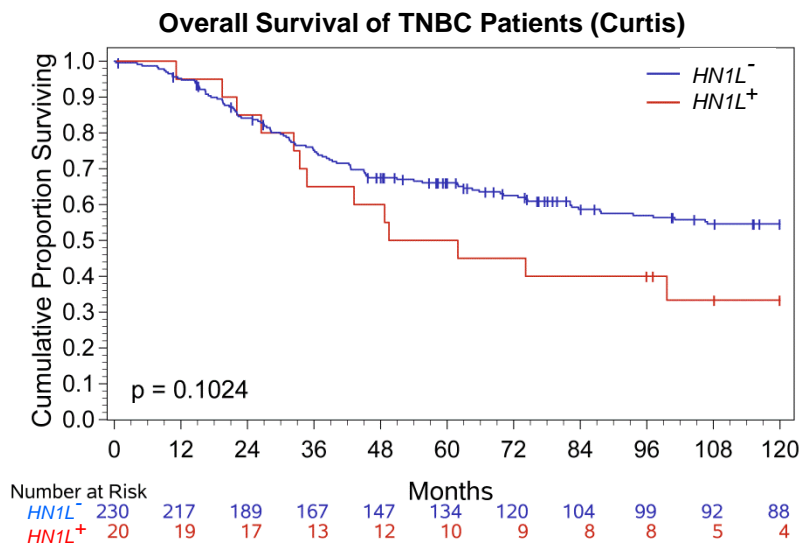

C

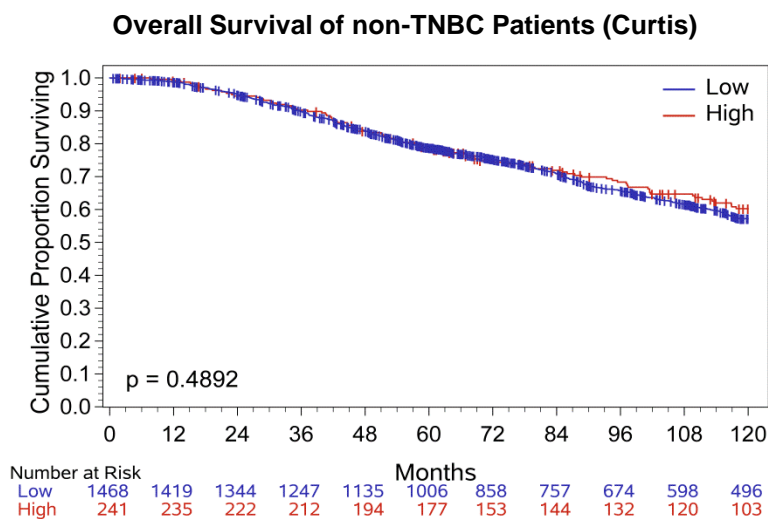

**Fig. S3**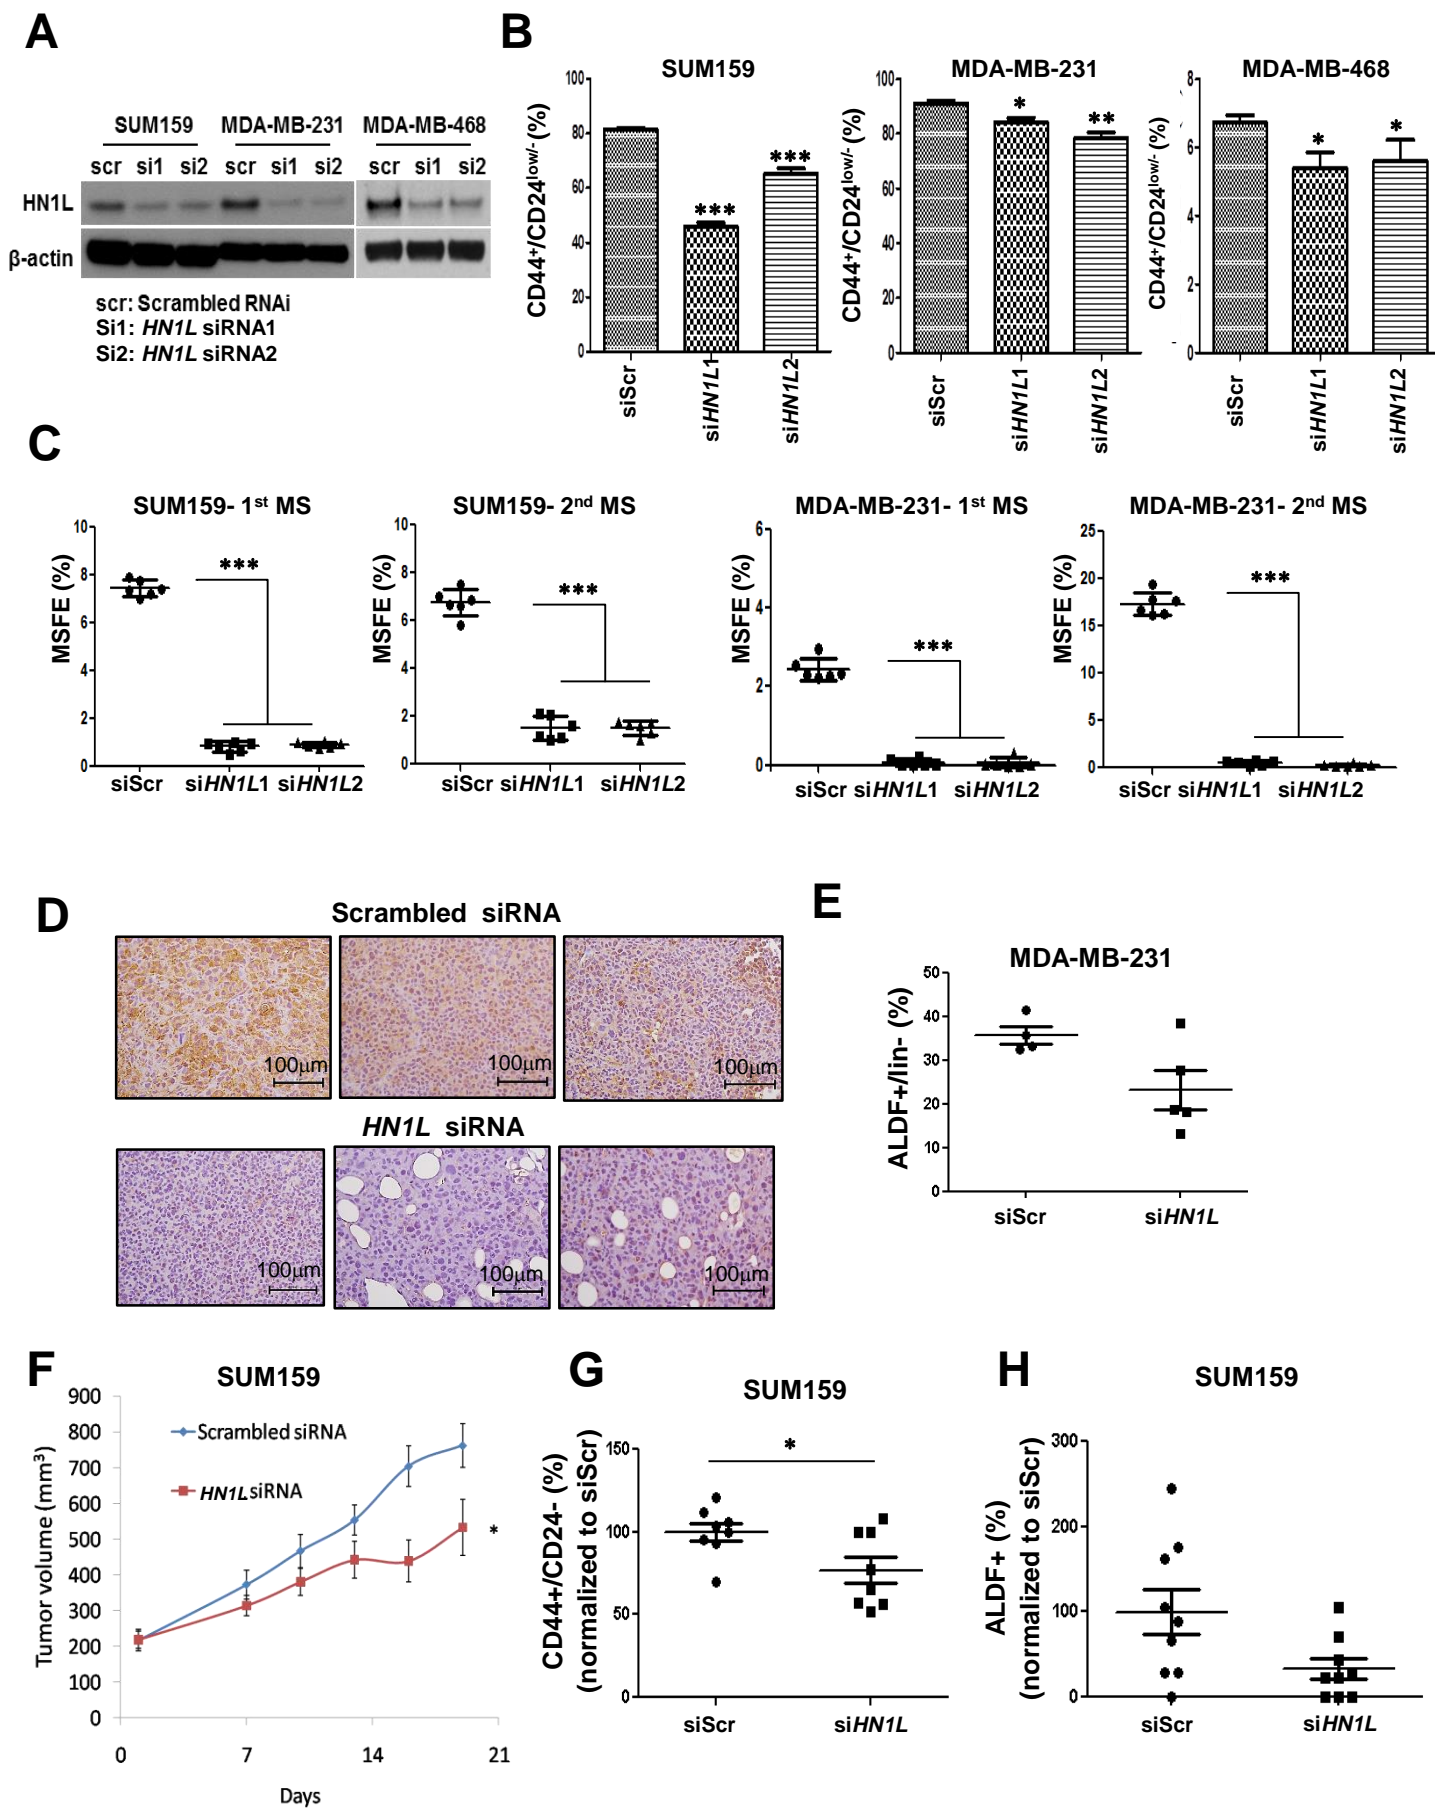

**Fig. S4****A**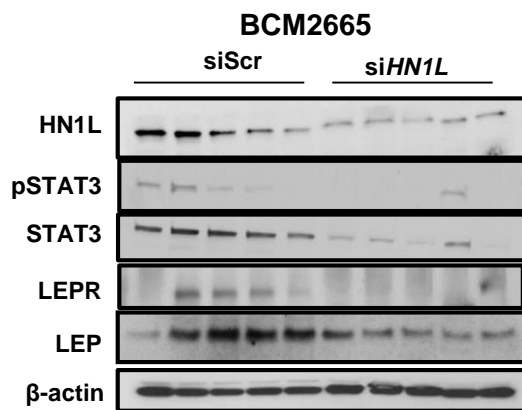**B**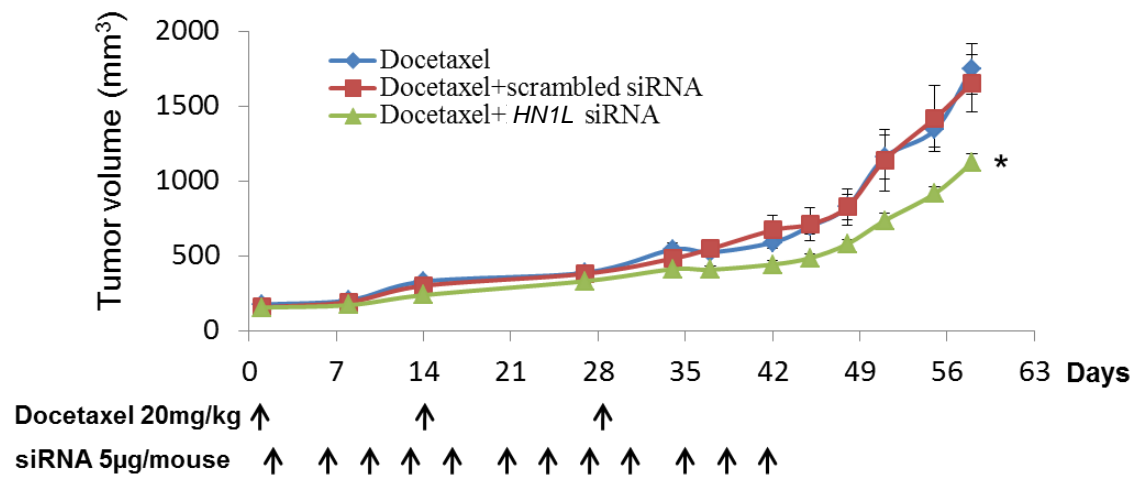**C**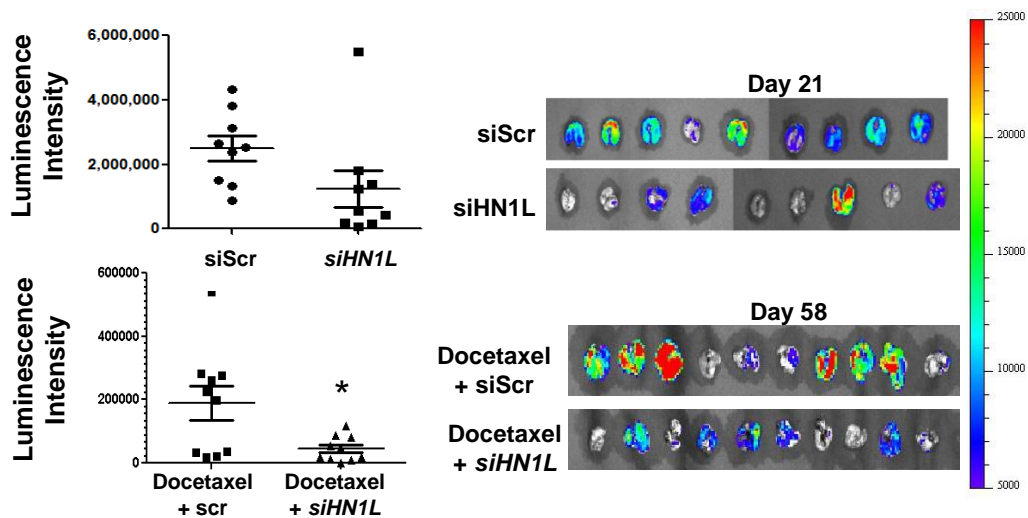

**Fig. S5**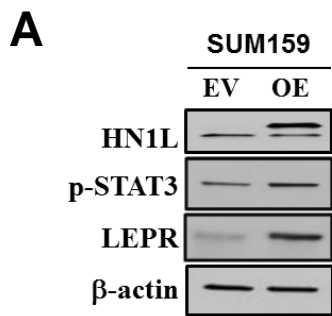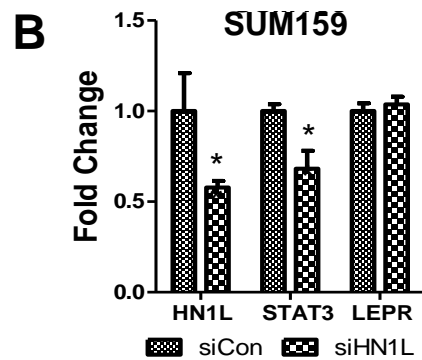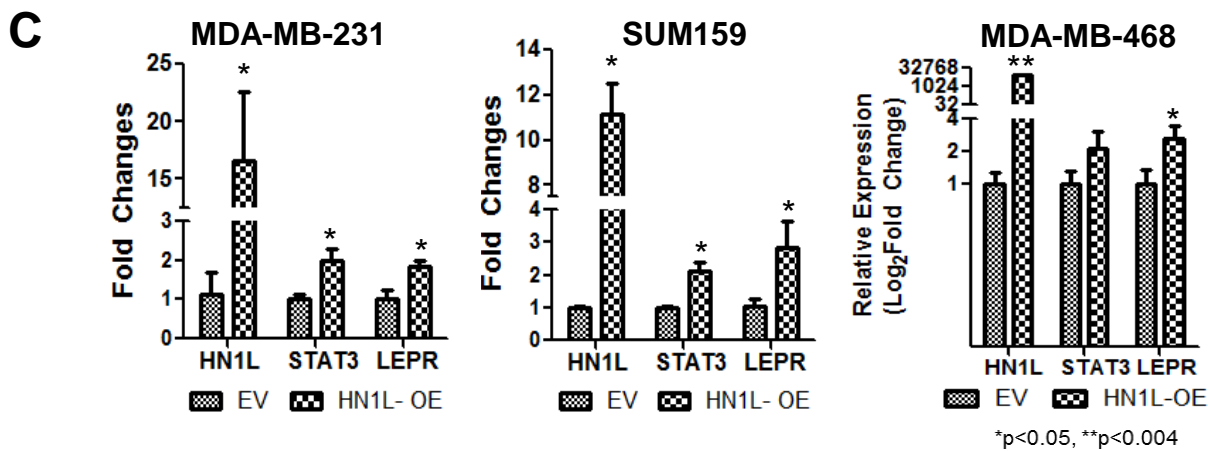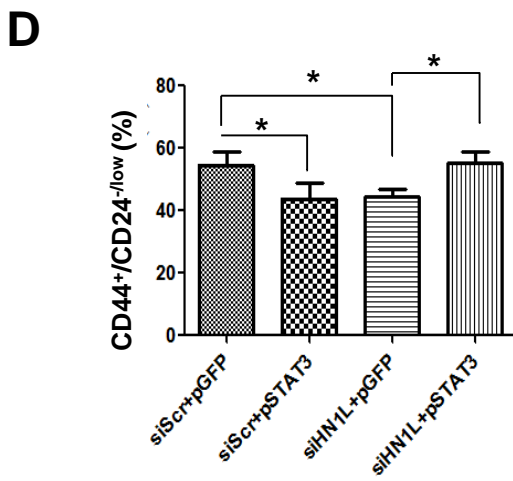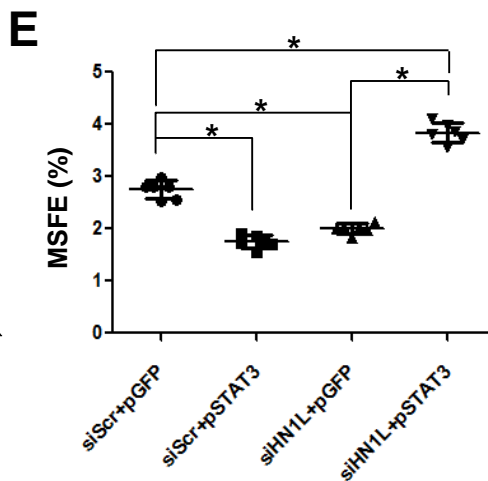

**Fig. S6**

**A**

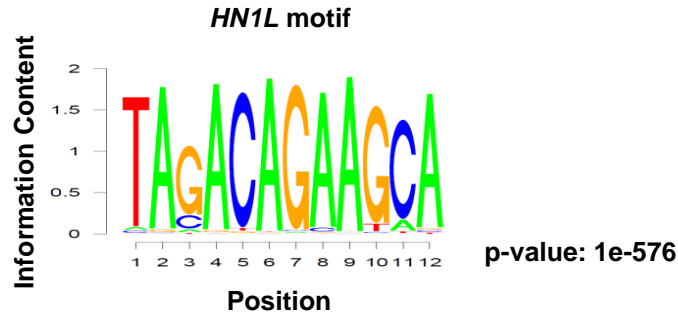

**B**

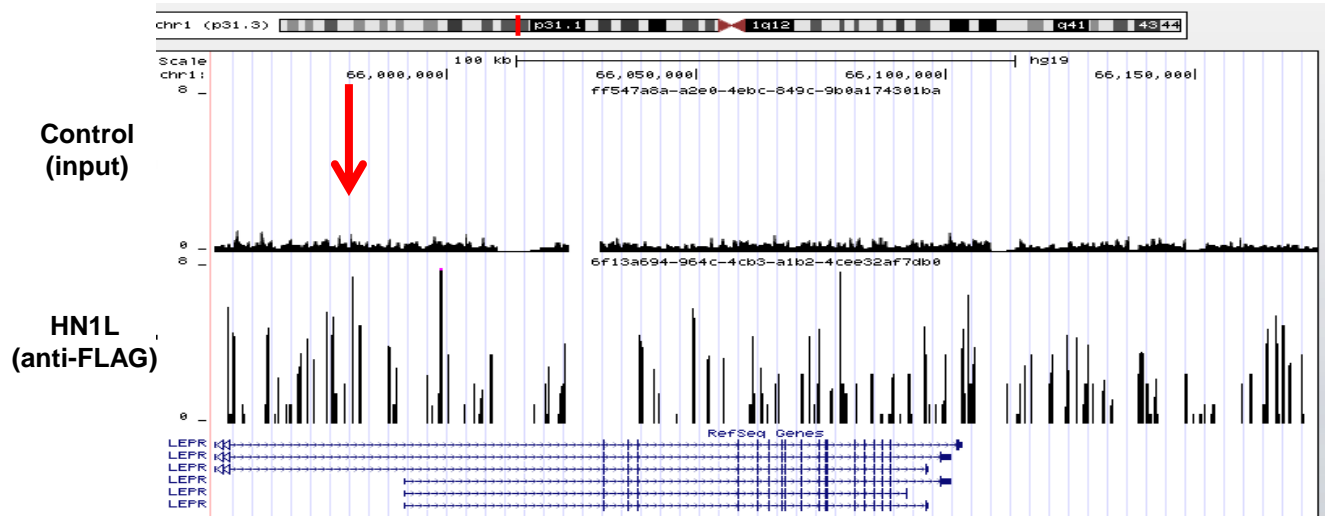

**C**

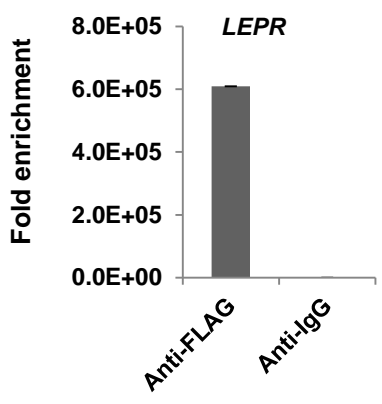

**D**

| Pathway ID (GO) | Pathway Description                                                  | False Discovery Rate | Matching Proteins in the Network                                                     |
|-----------------|----------------------------------------------------------------------|----------------------|--------------------------------------------------------------------------------------|
| 0045893         | Positive regulation of transcription, DNA-templated                  | 5.75E-05             | AR,ARID1B,EDN1,FGFR2,FOXP1,HOXA11,MYC,MYO6,PAX1,PBX1,PPP3CA,RERE,STAT3,TBX5,VDR      |
| 0045944         | Positive regulation of transcription from RNA polymerase II promoter | 5.75E-05             | AR,EDN1,FGFR2,FOXP1,MYC,MYO6,PAX1,PBX1,PPP3CA,RERE,STAT3,TBX5,VDR                    |
| 0009891         | positive regulation of biosynthetic process                          | 6.27E-05             | AR,ARID1B,EDN1,FGFR2,FOXP1,HOXA11,MYC,MYO6,NT5E,PAX1,PBX1,PPP3CA,RERE,STAT3,TBX5,VDR |
| 0022603         | Regulation of anatomical structure morphogenesis                     | 6.27E-05             | EDN1,EPHB3,FGD6,FGFR2,FOXP1,HOXA11,MYC,NEDD4L,PPP3CA,SH3KBP1,TBX5,VDR                |
| 0001763         | Morphogenesis of a branching structure                               | 0.000104             | EDN1,FGFR2,HOXA11,MYC,PBX1,RERE,VDR                                                  |

**Fig. S7**

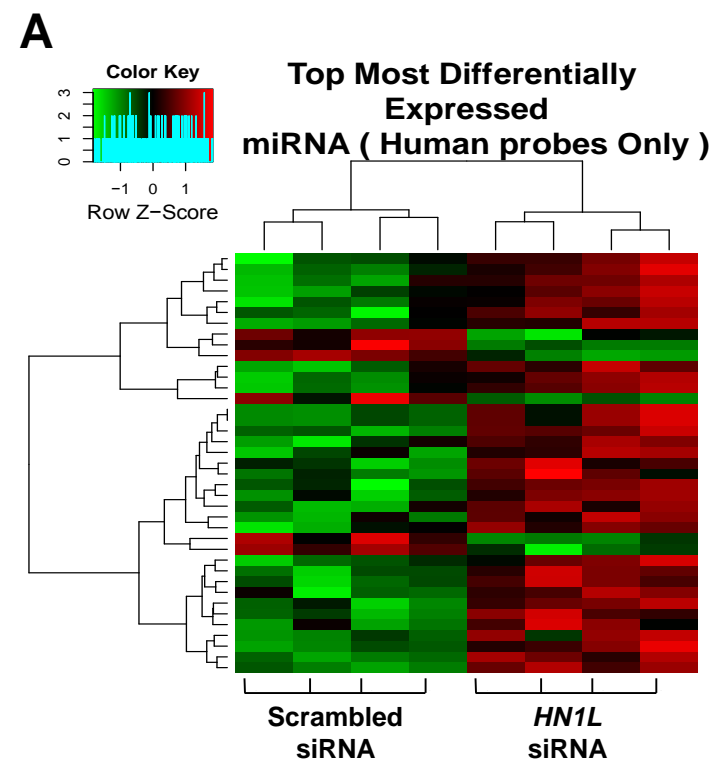

**B**

| Transcript.ID. Array Design | logFC     | t        | p Value  |
|-----------------------------|-----------|----------|----------|
| <b>hsa-miR-150-5p</b>       | -2.183121 | 7.984466 | 1.59E-05 |
| hsa-miR-3921                | -1.606919 | 5.161487 | 0.000493 |
| hsa-miR-5195-3p             | -1.173754 | 4.828139 | 0.000792 |
| hsa-miR-3188                | -1.150942 | 4.696959 | 0.000959 |
| hsa-miR-6746-3p             | 1.7503    | -5.45189 | 0.00033  |
| hsa-miR-6504-5p             | 1.76714   | -4.73776 | 0.000904 |
| hsa-miR-2113                | 2.16653   | -4.11002 | 0.002328 |
| hsa-miR-6868-3p             | 2.32171   | -4.73751 | 0.000904 |

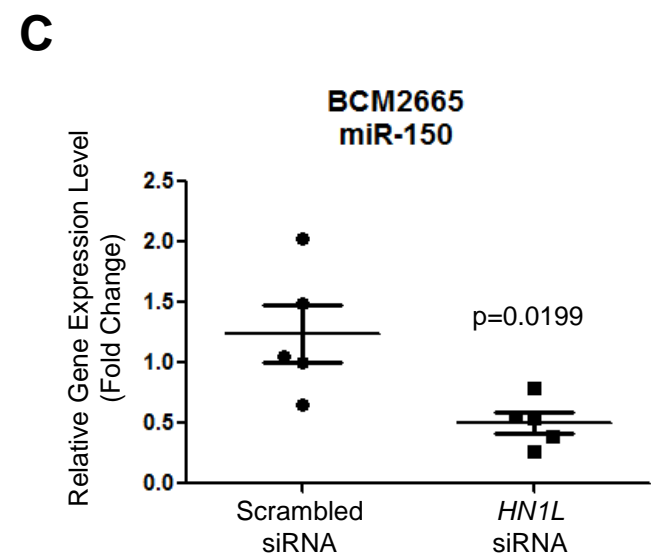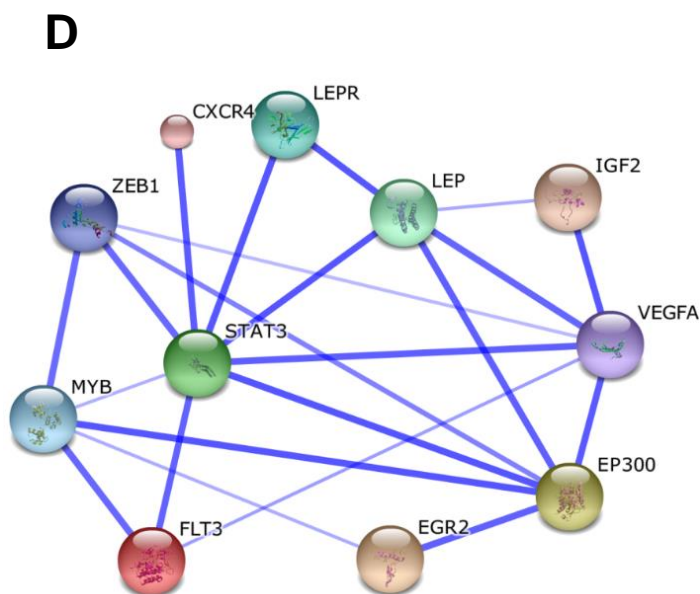

Supplement: mmc1.pdf [file mmc1.pdf]
